1 Characterization of core bacterial species in the *Daphnia magna* microbiota using

2 shotgun metagenomics

3 Reilly O. Cooper<sup>1\*</sup> & Clayton E. Cressler<sup>1</sup>

4 <sup>1</sup>School of Biological Sciences, University of Nebraska, Lincoln, NE, USA

5 \*Corresponding author: Reilly O. Cooper, Email: [reilly.cooper@huskers.unl.edu](mailto:reilly.cooper@huskers.unl.edu)

6 Clayton E. Cressler, Email: [ccressler2@unl.edu](mailto:ccressler2@unl.edu)

7

## 8 **Abstract**

9 *Background:* The keystone zooplankton *Daphnia magna* has recently been used as a  
10 model system for understanding host-microbiota interactions. However, the bacterial  
11 species present and functions associated with their genomes are not well understood.  
12 In order to understand potential functions of these species, we combined 16S rRNA  
13 sequencing and shotgun metagenomics to characterize the whole-organism microbiota  
14 of *Daphnia magna*.

15  
16 *Results:* Five metagenome-assembled genomes (MAGs) were assembled from the  
17 *Daphnia magna* microbiota. Phylogenetic placement of these MAGs indicated that two  
18 belong to the *Limnohabitans* genus, one to *Polaromonas*, one to *Pedobacter*, and one  
19 unclassifiable below the Burkholderiaceae family. Average nucleotide identity of these  
20 MAGs to their closest sequenced relative was <95%, suggesting these may be new  
21 species in known genera. 16S rRNA community profiling shows that the *Daphnia magna*  
22 microbiota is distinct from its culture environment. Genes involved in host colonization  
23 and immune system evasion were detected across the MAGs. Some metabolic  
24 pathways were specific to some MAGs, including sulfur oxidation, nitrate reduction, and  
25 flagellar assembly. Threonine and arginine exporters were encoded by the

26 *Limnohabitans* and Burkholderiaceae MAGs, and pathways for key vitamin biosynthesis  
27 and export were identified across MAGs.

28  
29 *Conclusions:* In this study, we characterize five metagenome-assembled bacterial  
30 genomes within the *Daphnia magna* microbiota. Our examination of functions  
31 associated with these genomes shows a diversity of nutrient acquisition and metabolism  
32 pathways present that may benefit the host, as well as genomic signatures of host  
33 association and immune system evasion.

34  
35 **Keywords:** Metagenomics, shotgun sequencing, *Daphnia magna*, microbiota function

36  
37 **Introduction**

38 Organisms are hosts to complex communities of microorganisms that live on any tissue  
39 in contact with the environment, collectively known as the microbiota. Species in the  
40 microbiota may provide beneficial functions to the host and to other species in the  
41 microbiota, including nutrient acquisition and uptake [1], production of host-accessible  
42 metabolites [2], host immune system priming [3], and direct pathogen protection [4].  
43 However, characterizing these beneficial host-microbe and microbe-microbe  
44 interactions in biologically relevant systems can be difficult due to the number of core

45 species present in the microbiota and the variation in an individual organism's  
46 microbiota over time from dietary changes or differential environmental exposure [5].  
47  
48 The zooplankton *Daphnia magna* provides a useful model for studying functional  
49 relationships between microbes and their hosts. *Daphnia* species are used as a model  
50 system in ecology, ecotoxicology, and host-parasite dynamics due to their well-  
51 documented life cycle and rapid asexual reproduction [6]. The ability to raise *Daphnia*  
52 *magna* clonally in the laboratory allows for genetically identical hosts to be used  
53 experimentally, reducing the impact of genetic variation on the microbiota.  
54 Furthermore, their indiscriminate filter feeding within the water column allows for  
55 control over food input. *Daphnia* are colonized with bacteria throughout their entire  
56 body cavity and gut [7,8]. Composition of the *Daphnia* microbiota appears to be similar  
57 in spatially unique populations [8,9], suggesting mechanisms of acquisition and  
58 cultivation of these microbes by the host. The *Daphnia* microbiota is relatively simple at  
59 the class level, with  $\beta$ -proteobacteria,  $\gamma$ -proteobacteria, and Flavobacteriia consistently  
60 identified at high relative abundances [9,10]. While some work on the *Daphnia*  
61 microbiota has used shotgun sequences to examine potential bacterial symbionts [7],  
62 the majority of studies have used coarse-level 16S rRNA analyses to profile the taxa  
63 present. Species-level identification and subsequent functional profiling of the *Daphnia*

64 microbiota has not been achieved with these studies, as resolution of the microbiota  
65 using 16S rRNA sequencing can only reliably identify bacterial genera. Much of the  
66 genomic content of *Daphnia*-associated bacteria is unknown, and potentially novel taxa  
67 may not be identified by standard 16S rRNA techniques.

68

69 Beyond identifying the composition of the microbiota, it is clear that this composition  
70 affects host fitness. The microbiota as a whole has been implicated in nutrient  
71 acquisition and breakdown of toxic compounds [11], and survival and growth are  
72 affected by the presence of, and perturbations to, the microbiota [12-14]. Host  
73 fecundity has been specifically tied to the most abundant genus in the *Daphnia*  
74 microbiota, *Limnohabitans*. Entirely bacteria-free *Daphnia* experience significant  
75 declines in fecundity, but monocolonization of bacteria-free *Daphnia* with  
76 *Limnohabitans* restores fecundity to that of *Daphnia* with a complete microbiota [15].  
77 However, it is unclear what metabolic functions *Limnohabitans* provides to achieve  
78 these effects. How the other species in the *Daphnia* microbiota contribute to host life  
79 history and what functions these species may be providing is entirely unclear.

80

81 Here, we use shotgun metagenomics to characterize the bacterial species present in  
82 the *Daphnia magna* microbiota. The metagenome-assembled genomes generated from

83 this data were then used to examine potential metabolic functions of the microbiota in  
84 total and for each species assembled. This study is the first to report metagenome-  
85 assembled genomes of bacteria in the *Daphnia magna* microbiota and is the first to  
86 suggest functions based on gene content of these microbes. This increased resolution  
87 allows us to formulate testable hypotheses about the metabolic interactions happening  
88 between the host and microbes, and among microbes, that impact host fitness. This  
89 functional knowledge will provide a new lens for studying this important ecological  
90 model system.

91

## 92 **Results**

### 93 **Shotgun sequencing, assembly, and binning**

94 Shotgun sequencing of the adult and juvenile *Daphnia magna* microbiota resulted in  
95 20.19Mbp of paired-end Illumina read data, which was then reduced to 9.64Mbp after  
96 quality trimming and host genome filtering. A co-assembly of all four samples  
97 generated 174,991 contigs (N50 of 1,923bp; longest assembled contig 226,522bp).  
98 Summaries of assembly statistics for the co-assemblies and the individual sample  
99 assemblies can be found in Table 1. Identification of high-quality reads and  $\geq 1000$ bp  
100 assembled contigs using Kraken, Kaiju, and MetaPhlan2 indicated 18 genera that were  
101 present as more than 1% of the sample (Supplementary Figure 1). Of the 18 genera,

102 only *Limnohabitans* was identified by all three tools in reads and contigs. Other  
103 abundant genera included *Pedobacter*, *Flavobacterium*, *Polaromonas* and other  
104 unclassified Burkholderiaceae. 16S rRNA sequencing of the library preparation and  
105 DNA extraction kits resulted in <50 reads (Figure 1A). 16S rRNA community profiles of  
106 the *Daphnia magna* food source, *Chlamydomonas reinhardtii*, the COMBO culture  
107 media *Daphnia magna* are raised in, and samples of 5 healthy adult *Daphnia magna*  
108 were found to have differences in composition (Figure 1A). The *Chlamydomonas*  
109 samples showed reduced relative abundance of Proteobacteria as compared to adult  
110 *Daphnia* and the culture media. The culture media showed higher relative abundance  
111 of Actinobacteria, and healthy *Daphnia magna* primarily were colonized by  
112 Proteobacteria and Bacteroidetes. These same community profiles were analyzed using  
113 an unweighted principal coordinate analysis (PCoA) on the unweighted UniFrac  
114 distances between samples, which represents the phylogenetic relatedness between  
115 samples based on ASV presence and absence (Supplementary Figure 2). The three  
116 sample groups were found to cluster separately, with no overlap.  
117

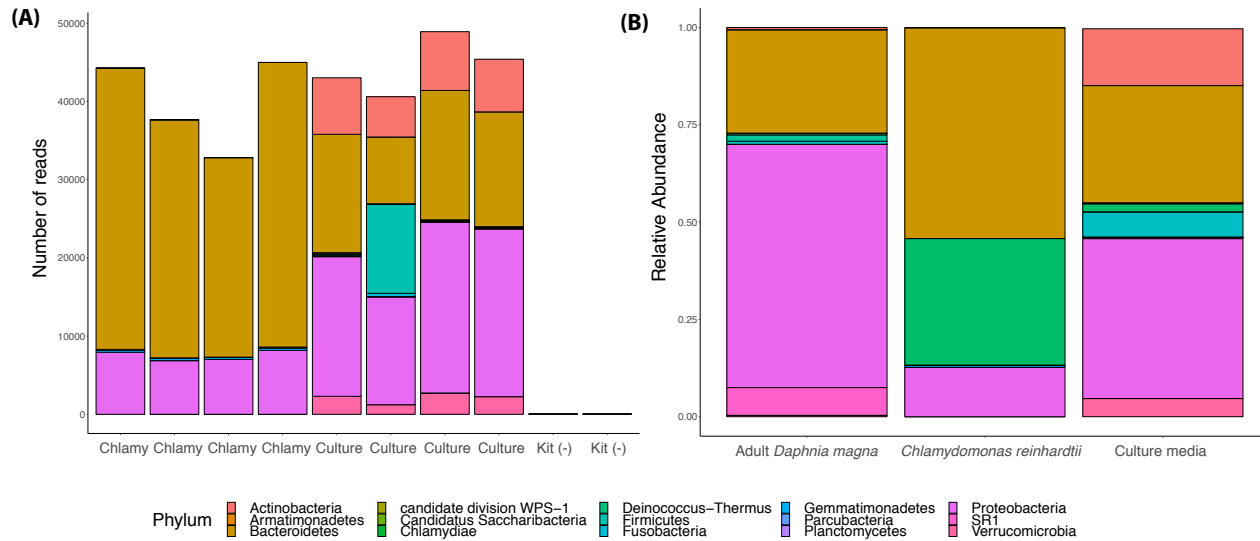

118  
 119 **Figure 1. (A)** Phylum-level 16S rRNA profiles of *Chlamydomonas reinhardtii* (Chlamy, n  
 120 = 4), COMBO culture media (Culture, n= 4), and the DNA extraction kit and library  
 121 preparation kit used for sequencing (Kit (-), n=2). **(B)** Relative abundance of phyla  
 122 generated from 16S rRNA community profiles in *Chlamydomonas reinhardtii*, healthy  
 123 adult *Daphnia magna*, and the culture media (all n=4).  
 124

| Assembly             | Total assembly length (bp) | Number of contigs | Number of contigs $\geq 1$ kb | Largest contig (bp) | GC content (%) | N50   |
|----------------------|----------------------------|-------------------|-------------------------------|---------------------|----------------|-------|
| Master co-assembly   | 50,283,761                 | 174,991           | 9,449                         | 226,522             | 51.7           | 1,923 |
| Adult co-assembly    | 27,616,512                 | 93,427            | 4,021                         | 103,086             | 53.61          | 1,535 |
| Juvenile co-assembly | 32,024,657                 | 17,982            | 6,627                         | 142,752             | 49.18          | 3,165 |
| Adult sample 1       | 11,565,605                 | 39,625            | 2,783                         | 62,388              | 52.42          | 1,546 |



|          |            |        |       |        |       |       |  |
|----------|------------|--------|-------|--------|-------|-------|--|
| Adult    |            |        |       |        |       |       |  |
| sample 2 | 22,274,108 | 65,709 | 3,585 | 85,806 | 54.09 | 2,074 |  |
| Juvenile |            |        |       |        |       |       |  |
| sample 1 | 24,570,320 | 65,656 | 5,093 | 85,390 | 49.05 | 3,179 |  |
| Juvenile |            |        |       |        |       |       |  |
| sample 2 | 22,525,058 | 50,433 | 4695  | 65,631 | 49.35 | 3,256 |  |

125 **Table 1.** Summary of assembly statistics for individual sample assemblies and co-  
126 assemblies of all four samples (master co-assembly), the two adult samples (adult co-  
127 assembly), and the two juvenile samples (juvenile co-assembly).  
128  
129 CONCOCT clustering of contigs from the master co-assembly by tetranucleotide  
130 composition, GC content, and coverage resulted in 19 bins of draft and incomplete  
131 genomes. Manual curation, refinement, and merging using Anvi'o resulted in 15 bins,  
132 with 7 meeting the  $\geq 50$  quality metric. The adult-only co-assembly generated 12 bins,  
133 which further refined to 5 bins, with 4 meeting the  $\geq 50$  quality metric (Supplementary  
134 Figure 5). Three of the four high-quality bins were also present in the master co-  
135 assembly and one unique bin was identified. The juvenile-only co-assembly generated  
136 15 bins, which further refined to 7 bins, with 4 meeting the  $\geq 50$  quality metric  
137 (Supplementary Figure 6). Because the master co-assembly generated bins with higher  
138 coverage or higher completeness, we used GTDB-Tk on bins refined in the master co-  
139 assembly only. Phylogenetic placement using GTDB-Tk for the seven high- and  
140 medium-quality bacterial MAGs identified from the master co-assembly placed two in  
141 the *Limnohabitans* genus (*Limnohabitans* MAG 1 and MAG 2), one in the *Polaromonas*

142 genus (*Polaromonas* MAG), one unable to be placed below the Burkholderiaceae family  
143 (Burkholderiaceae MAG), one in the *Pedobacter* genus (*Pedobacter* MAG), one in the  
144 *Emticicia* genus, and one unable to be placed below the Chitinophagales order  
145 (Supplementary Table 1; Supplementary Figure 4). None of the MAGs mapped to  
146 previously identified species in the GTDB-Tk database. Average nucleotide identity of  
147 the two *Limnohabitans* MAGs was measured at 86.6% similarity. This is less than the  
148 95% cutoff generally accepted for strain-levels similarity, suggesting the MAGs are  
149 likely separate species [16].

150

151 To examine potential functions of the *Daphnia magna* microbiota, we focused on the  
152 three most complete MAGs: unknown Burkholderiaceae, 99.28% complete, 11.5X  
153 mean coverage; *Pedobacter* sp., 98.56% complete, 14.87X mean coverage; and  
154 *Polaromonas* sp., 82.73% complete, 15.3X mean coverage. We also examined the two  
155 *Limnohabitans* MAGs: sp1, 78.42% complete, 29.99X coverage; sp2, 60.43% complete,  
156 14.16X coverage (Figure 2). Though the *Limnohabitans* MAGs were not over 90%  
157 complete, according to read-based and contig-based identification tools they were the  
158 most abundant, and coverage of both exceeded 30x in the juvenile *D. magna* samples.  
159 Furthermore, prior work has indicated the presence and importance of this genus in the  
160 *Daphnia magna* microbiota, suggesting unique functions may be present in these

161 genomes. We extracted the nearest matching reference genome for each of the five  
162 MAGs above and calculated ANI for each to further investigate if these MAGs were  
163 novel or just new strains of already sequenced species (Table 2).  
164

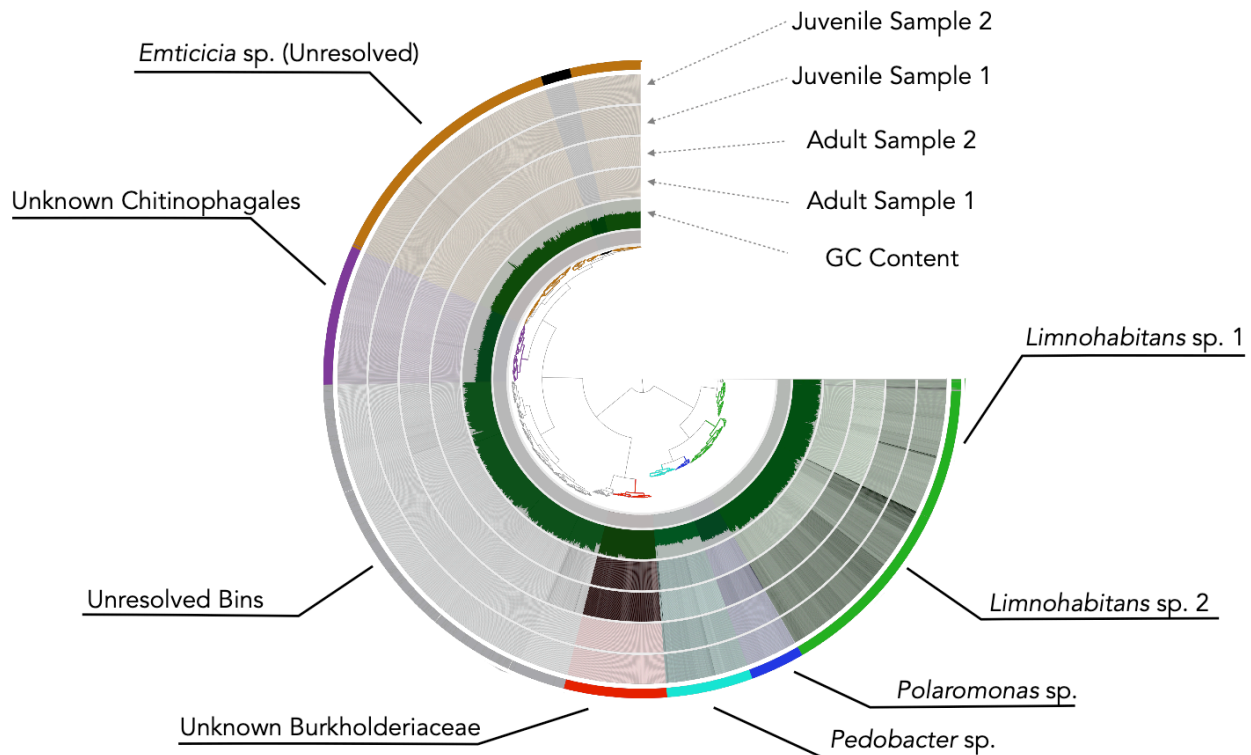

165  
166 **Figure 2. (A)** Anvi'o display of the two adult and two juvenile samples with the  
167 metagenome-assembled genomes highlighted in color. The innermost dendrogram  
168 represents similarity among contigs based on sequence composition, GC content  
169 (green inner ring), and differential coverage (black bars across the four grey rings). The  
170 outermost layer shows the genome bins. Genome bin identification performed by  
171 GTDB-Tk.

172

173

| <b>MAG</b>                 | <b>Closest<br/>Sequenced Relative</b> | <b>ANI</b> |
|----------------------------|---------------------------------------|------------|
| <i>Limnohabitans</i> sp. 1 | <i>Limnohabitans</i> sp. 63ED37-2     | 0.879      |
| <i>Limnohabitans</i> sp. 2 | <i>Limnohabitans</i> sp. Rim28        | 0.820      |
| Unknown                    |                                       |            |
| Burkholderiaceae           | <i>Pigmentiphaga</i> sp. NML080357    | 0.693      |
| <i>Pedobacter</i> sp.      | <i>Pedobacter ruber</i>               | 0.773      |
| <i>Polaromonas</i> sp.     | <i>Polaromonas</i> sp. A23            | 0.761      |

174 **Table 2.** Average nucleotide identity of the five MAGs of interest to their nearest

175 sequenced relative. The closest sequenced relative was identified from placement

176 within GTDB-Tk's reference phylogeny output.

177

178 **Functional profiling of the five high- and medium-quality bacterial metagenome-**  
179 **assembled genomes**

180 Contigs from the entire metagenome and from the 5 MAGs independently were

181 analyzed for potential coding sequences (CDS) using Prokka. All identified CDS were

182 then queried against the KEGG database using GhostKOALA and identified orthologs

183 of functional genes were grouped and quantified into KEGG functional categories

184 (Figure 3). We focused on pathways associated with respiration, carbohydrate

185 metabolism, amino acid metabolism, other energy metabolism, and transport. These

186 functional categories indicate not only general metabolism for these species, but also

187 could indicate what functions these species are providing to the host. Out of the 7,453  
188 CDS from the five high-quality MAGs that mapped to KEGG pathways, 707 (9.48%)  
189 were associated with carbohydrate metabolism, 642 (8.71%) were associated with  
190 amino acid metabolism, and 358 (4.80%) were associated with other energy  
191 metabolism (Figure 3A-B; Supplementary Figure 3). Although *C. reinhardtii* has a  
192 relatively high concentration of lipids [17], only 188 (2.52%) of all CDS were associated  
193 with lipid metabolism. To understand how much genetic overlap there was among the  
194 five MAGs, we compared predicted genes identified with Prokka and clustered with  
195 OrthoVenn. The two *Limnohabitans* MAGs shared the highest number of genes (641),  
196 and across all MAGs 325 genes were shared (Figure 4). The *Pedobacter* MAG had the  
197 most unique genes in its gene set (117), while the Burkholderiaceae had so much  
198 overlap with other MAGs that it had relatively few unique genes (21).  
199

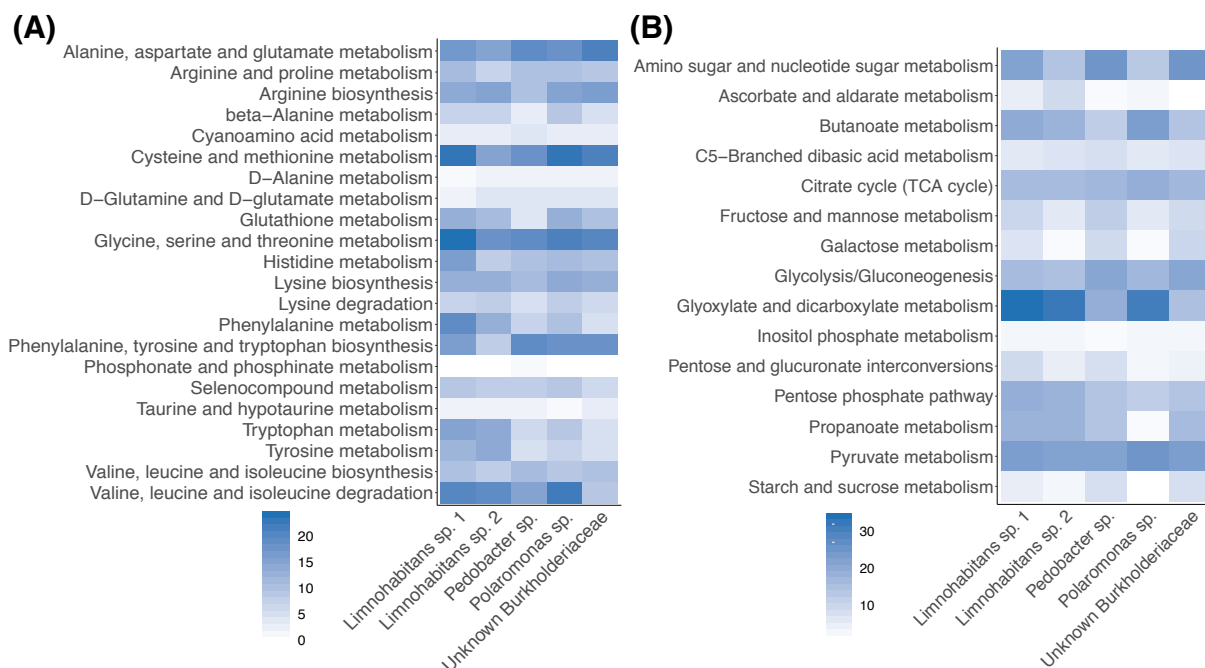

200

201 **Figure 3. (A)** Number of genes associated with carbohydrate metabolism pathways in

202 the five MAGs. Genes within each MAG bin were annotated with Prokka, assigned

203 KEGG orthology, and mapped to KEGG metabolic pathways. Genes assigned to

204 pathways were then counted. **(B)** Number of genes associated with KEGG amino acid

205 metabolism pathways in the five MAGs.

206

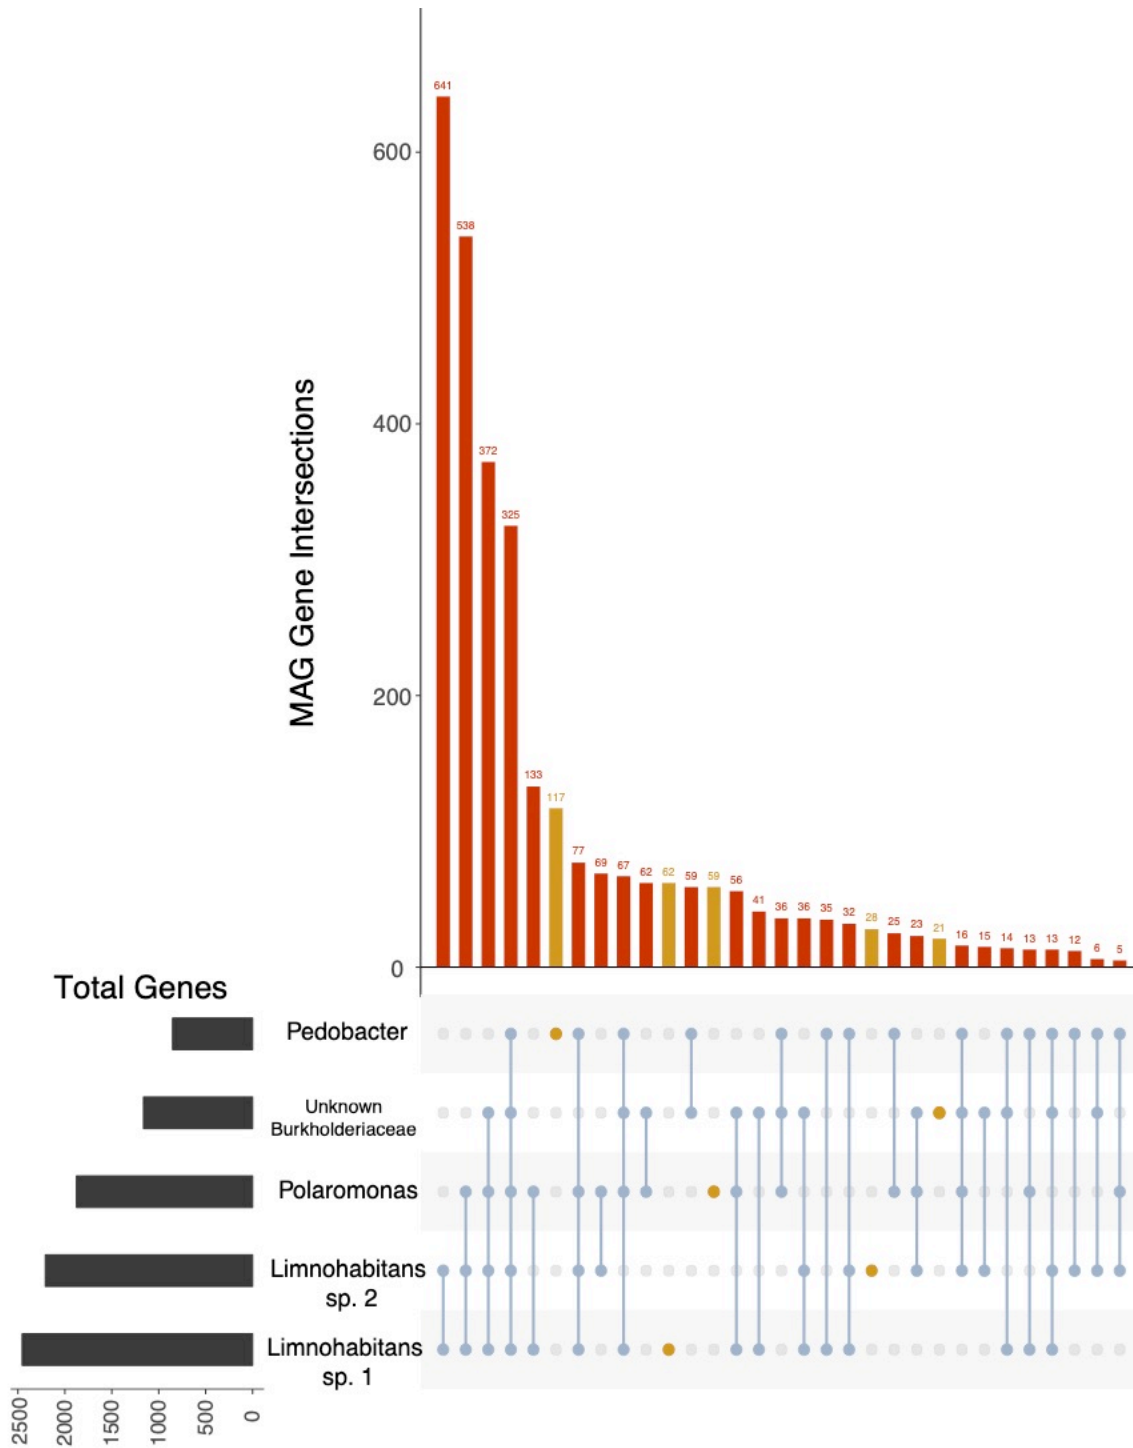

207

208 **Figure 4.** Shared and unique genes with KEGG orthologs in each MAG. Unique gene

209 sets are highlighted in gold; shared genes are in red. Intersections between MAGs, or

210 numbers of genes in each MAG's gene set shared with the other MAGs connected by  
211 lines, are noted in the bottom matrix. The total number of genes in each MAG is listed  
212 on the left side of the matrix.

213

214 (Table after references)

215 **Table 3.** Shared and unique complete KEGG pathways in the five high- and medium-  
216 quality MAGs. 'MAG' column indicates which MAG encodes that complete pathway;  
217 'All' denotes that the pathway is shared among all five MAGs.

218

219 After examining genetic overlap and unique gene content of the five MAGs, we  
220 examined complete metabolic pathways annotated by KEGG present in the microbiota.  
221 Here, we describe some of the complete pathways annotated, specifically focusing on  
222 metabolic pathways involved in critical functions for bacteria such as nutrient uptake  
223 and biosynthesis as well as pathways that may be involved in host or environment  
224 interaction. A description and comparison of each MAG's set of complete pathways can  
225 be found in Supplementary Materials and in Supplemental Tables 2-5. We separate  
226 complete pathways into those encoded by all or multiple MAGs, indicating shared  
227 pathways that could indicate functional redundancy or common metabolites accessible  
228 to multiple species, and pathways uniquely encoded by single MAGs, indicating



229 potential niche differentiation within the microbiota [18]. Finally, we summarize some of  
230 the described shared and unique functions and some functions specifically associated  
231 with host association as genomic signals of host association, providing potential  
232 explanations for why these genera are commonly found in the *Daphnia magna*  
233 microbiota.

234

### 235 **Shared functions of the *Daphnia magna* microbiota**

236 *Nutrient uptake and major biosynthesis pathways.* All five MAGs shared genes involved  
237 in some key metabolic pathways (Table 3, 'All' MAGs, Supplementary Tables 2 & 3). In  
238 all MAGs, a complete TCA cycle was encoded. Genes encoding a cytochrome c  
239 oxidase were identified in all MAGs, suggesting all have the capacity for aerobic  
240 respiration. All encoded for lipopolysaccharide transport and lipoprotein release. All  
241 MAGs except the *Pedobacter* encoded for a complete glyoxylate cycle, and the non-  
242 oxidative phase of the pentose phosphate pathway was present in all MAGs except the  
243 *Limnohabitans* species. Transporters for multiple TCA cycle intermediates are present  
244 across the MAGs, including a C<sub>4</sub>-dicarboxylate transport system in all MAGs that allows  
245 for transport of multiple different molecules into bacterial cells. Other transporters for  
246 TCA cycle intermediates encoded included those for alpha-glucosides, malate,  
247 fumarate, 2-oxogultarate, succinate, and aspartate.

248

249 Transport and biosynthesis of other essential molecules were shared across MAGs as

250 well. All MAGs except *Pedobacter* shared transport systems for phospholipids,

251 phosphate, and branched-chain amino acids. All species except for *Limnohabitans*

252 MAG 2 encoded for the elongation step of fatty acid biosynthesis, but only the

253 Burkholderiaceae, *Polaromonas*, and *Pedobacter* MAGs encoded for fatty acid

254 biosynthesis initiation. The *Limnohabitans* MAGs shared multiple copies of sialic acid

255 TRAP transporter genes (*siaM*, *siaT*, *siaQ*).

256

257 All genomes encoded for the transport of multiple necessary vitamins, including

258 riboflavin (B<sub>2</sub>, *ribX*, *ribY*, *ribZ*), pantothenate precursors (B<sub>5</sub>, *panS*), and cobalamin (B<sub>12</sub>,

259 *btuB*). Genes involved in the salvage pathway for cobalamin were also present in both

260 *Limnohabitans* MAGs and in the *Polaromonas* MAGs (*cobO*, *cobP*). Some species were

261 also able to biosynthesize vitamins: the *Pedobacter* and *Polaromonas* MAGs encoded

262 for biotin biosynthesis, and all MAGs except *Pedobacter* encoded for tetrahydrofolate

263 biosynthesis. All MAGs encoded for a pyridoxine 5-phosphate synthase (PdxJ),

264 indicating likely biosynthesis of pyridoxine (B<sub>6</sub>).

265

266 Biosynthesis and transport of amino acids varied across MAGs, with no shared amino  
267 acid transport systems present across all species. All MAGs except *Pedobacter* were  
268 able to biosynthesize arginine and ornithine. The Burkholderiaceae, *Limnohabitans* 1,  
269 and *Polaromonas* MAGs encoded for threonine, cysteine, lysine, proline, phenylalanine,  
270 tyrosine, and glutathione biosynthesis. Valine, leucine, and tryptophan were also able  
271 to be biosynthesized by some of the MAGs.

272  
273 *Host and environment interaction.* Superoxide dismutase (*sodA*, *sodB*) and catalase-  
274 peroxidase (*katG*) were found in all MAGs. These act as reactive oxygen species  
275 detoxifiers and scavengers. The universal minimal Tat system was encoded by all MAGs  
276 (*tatA*, *tatC*), and both *Limnohabitans* MAGs also encoded *tatB*, allowing all of these  
277 species to transport folded proteins across their cell membranes. Complete adhesin  
278 transport systems and a gene associated with type IV pilus biosynthesis were present in  
279 both *Limnohabitans* MAGs and the *Polaromonas* MAG (*pilQ*). These MAGs also  
280 encoded two membrane proteases related to aminoglycoside resistance (*HtpX*, *FtsH*)  
281 [19]. All MAGs except the *Pedobacter* encoded for the QseC-QseB quorum sensing  
282 regulatory system. Though the *Polaromonas* MAG was the only one to encode for  
283 complete flagellar assembly, the *Limnohabitans* MAGs encoded for multiple genes

284 involved in flagellar assembly (*flhA*, *flhB*, *flgB* – *L*). A gene for chemotaxis protein CheA  
285 was present in these three MAGs as well.

286

287 As none of the MAGs encoded for all necessary amino acid biosynthesis pathways,  
288 some amino acid importers were present across the MAGs. These include arginine  
289 (*artM*), proline (*proP*), cystine (*yecS*) in *Limnohabitans* MAGs, glutamine (*glnQ*, *glnM*)  
290 and glutathione (*gsiC*) in *Limnohabitans* MAGs and in the *Polaromonas* MAG, and  
291 histidine (*hisP*, *hisM*, *hisQ*) in the Burkholderiaceae MAG and *Limnohabitans* MAG 1. It  
292 is unclear whether food (e.g., *Chlamydomonas reinhardtii*) or export from other bacteria  
293 is the source of these amino acids for these MAGs. As some MAGs are able to  
294 biosynthesize amino acids that others must import, there may be cross-feeding among  
295 species in the microbiota occurring.

296

297 Environmental stress tolerance mechanisms were shared among genomes as well. All  
298 encoded for the phosphate starvation response regulatory system PhoR-PhoB. The  
299 *Limnohabitans* MAGs and the *Polaromonas* MAG shared the EnvZ-OmpR osmotic  
300 stress response system, allowing the bacterial cells to respond to changes in osmolality.  
301 *Limnohabitans* MAG 2 and the *Polaromonas* MAG shared CusS-CusR, a copper  
302 tolerance regulatory system.

303

304 **MAG-specific functions of the *Daphnia magna* microbiota**

305 *Nutrient uptake and major energy pathways.* There were potential differences in

306 respiration for some of the MAGs. The Burkholderiaceae encoded a nitrate/nitrite

307 transporter (*narK*) and a respiratory nitrate reductase (*narGHI*). Use of this system for

308 respiration was supported by the presence of genes encoding the nitrate respiration

309 two-component regulatory system NarX-NarL. The *Polaromonas* encoded for

310 thiosulfate transport (*cysT*, *cysW*, *cysP*) and potential use via a subunit of the Sox

311 complex (*soxA*). We found a supplementary energy pathway in the *Limnohabitans*

312 MAGs, which share a pathway for the biosynthesis of bacteriochlorophyll (*pufLM*, *bchY*).

313 This pathway has been documented in other *Limnohabitans* species [20].

314

315 Differences in carbohydrate metabolism among MAGs was apparent. The *Pedobacter*

316 MAG was the only high-quality genome to encode for glycolysis and glycogen

317 biosynthesis; the Burkholderiaceae MAG for the Leloir pathway; and *Limnohabitans*

318 MAG 2 for the Entner-Doudoroff pathway. The *Polaromonas* MAG encoded for a

319 complete beta-oxidation system, enabling fatty acid metabolism. Different

320 carbohydrate transporters were found in the MAGs as well. *Limnohabitans* MAG 1

321 uniquely encoded for the transport of glucose, mannose, and glycerol (*gtsABC*, *malk*).

322 It also encoded for transport of L-arabinose (*araPQ*) and for a semiSWEET general sugar  
323 transporter. The Burkholderiaceae MAG encoded for methyl-galactoside transport  
324 (*mglABC*) and a galactose processing pathway. The *Pedobacter* MAG can potentially  
325 utilize chitin, as the MAG uniquely encoded for chitin degradation to fructose-6-  
326 phosphate (*chiA*, *chb*, *nagB*).

327  
328 Other pathways for vitamin and amino acid import, biosynthesis, and degradation were  
329 uniquely present in some genomes. *Limnohabitans* MAG 1 was the only MAG to  
330 encode taurine import (*tauA*, *tauB*). This MAG also uniquely encoded a pathway for the  
331 degradation of histidine to glutamate. *Limnohabitans* MAG 2 could transport thiamine  
332 into the cell via a putative thiamine transport system (KEGG Module M00192).  
333 Uniquely, *Polaromonas* could synthesize cobalamin (*cobA*, *cobQ*, *cbiB*, *cobP*, *cobC*). It  
334 may also synthesize riboflavin via the purine biosynthesis pathway.

335  
336 *Host and environment interaction.* Multiple genes and pathways involved in antibiotic  
337 resistance and detoxification were found in the bacterial MAGs. *Pedobacter* encoded  
338 an MdlAB/SmdAB transporter as well as two genes involved in macrolide (*macA*, *macB*).  
339 The *Polaromonas* MAG encoded an AcrAB-TolC/SmeDEF efflux pump, and the

340 Burkholderiaceae MAG encoded the BaeS-BaeR envelope stress response two-  
341 component regulatory system.

342

343 The MAGs encoded for different secretion systems and regulatory systems. The  
344 *Polaromonas* MAG was the only one to encode for a type I secretion system (RaxAB-

345 RaxC). The Burkholderiaceae MAG encoded for an alpha-hemolysin and cyclolysin  
346 secretion system and a type IV secretion system (*virB1 – 5, 10, 11*). The

347 Burkholderiaceae MAG encoded for an osmotically-inducible protein, OsmY, part of an  
348 osmoprotectant ABC transporter complex, and a putrescine transporter (*potFGHI*).

349

### 350 **Genomic signs of host association in the *Daphnia magna* microbiota**

351 Because the *Daphnia magna* microbiota has been shown to differ significantly from the  
352 surrounding aquatic environment at the genus level [9,21], we examined the MAGs for

353 any potential indicators of host association. Multiple instances of host immune system

354 evasion or tolerance were noted in the MAGs. Both *Limnohabitans* MAGs encoded for  
355 the microbial stealth protein CpsY, implicated in host immune system evasion [22].

356 Genes involved in dTDP-L-rhamnose biosynthesis were present in all MAGs, indicating  
357 these species are able to use rhamnose as an alternative cell wall polysaccharide. L-

358 rhamnose has been linked to bacterial viability and virulence [23], and similarly

359 structured polysaccharides have been shown to modulate host immune systems [24]. A  
360 gene involved in quorum quenching (signaling between other microbial species or  
361 between microbes and the host) was identified in *Limnohabitans* MAG 1 and the  
362 *Pedobacter* MAG (*ytnP*). Other virulence factors and regulators were identified in both  
363 *Limnohabitans* and the *Pedobacter* MAG (*cvfB*, *bvgS/bvgA*).

364  
365 These bacterial species may benefit the host via amino acid and vitamin biosynthesis  
366 and export. Complex eukaryotes must acquire some essential vitamins and amino acids  
367 from their diet or from heterotrophic microorganisms. Six amino acids have been  
368 demonstrated as essential for *Daphnia magna*'s close relative, *Daphnia pulex*: arginine,  
369 histidine, leucine, phenylalanine, isoleucine, and tryptophan [25]. All of the dietary  
370 essential amino acids are biosynthesized by at least one of the MAGs, and some may  
371 be able to export these as well. The *Limnohabitans* MAGs and the Burkholderiaceae  
372 MAG encode for an arginine exporter (*argO*), *Limnohabitans* sp. 1 encodes for a  
373 threonine exporter (*rhtA*), and the Burkholderiaceae MAG a threonine-serine exchanger  
374 (*steT*). The *Chlamydomonas reinhardtii* food source used here does not contain  
375 cobalamin [26], a beneficial vitamin for *Daphnia magna*, suggesting that *Daphnia*  
376 *magna* raised in culture must acquire cobalamin from the culture media and from  
377 microorganisms. In the *Daphnia* metagenome, the *Polaromonas* MAG encodes for



378 cobalamin biosynthesis. Other vitamins are biosynthesized by at least one of the MAGs,  
379 including tetrahydrofolate, biotin, and pyridoxine. Supplementation of *Daphnia magna*  
380 growth media with biotin and cobalamin has been shown to increase host fitness [27],  
381 though it is unclear if these vitamins are essential for *Daphnia* survival.

382

383 Other host-microbe interactions were also present in the MAGs. An essential nutrient  
384 for bacteria is iron, and catalase genes were found in all MAGs along with other ABC  
385 transporters for iron. The *Limnohabitans* MAG 2 encoded for heme binding proteins  
386 and a heme export system (*ccmB*, *ccmC*), systems implicated in bacterial use of host-  
387 synthesized heme [28]. The *Pedobacter* MAG encoded for an N-acetylneuraminate  
388 lyase (*nanA*) and all five MAGs contain genes involved in transport of sialic acids. As  
389 sialic acids are found in complex host tissue [29], this may indicate cleavage of sialic  
390 acids from host cells for import and use by the bacteria. Pathways involved in host  
391 invasion and colonization were also present in the MAGs. The *Polaromonas* MAG  
392 encoded a suite of type IV pilus and fimbriae associated genes, including type IV pilus  
393 biogenesis factors (*pilY1*, *pilQ*), fimbrial proteins (*pilE*), the type IV fimbriae synthesis  
394 two-component regulatory system PilS-PilR, and a complete set of flagellar assembly  
395 genes. This MAG, along with the two *Limnohabitans* Mags, also encoded for twitching  
396 motility (*pilT*). Both *Limnohabitans* MAGs encoded for swarming motility (*swrC*, *rssA*),

397 and all three for other genes involved in chemotaxis (*pctA*, *cheA*, *cheY*, *tar*, *cheB*,  
398 *mcp4*, *tsr*, *cheW*). Though genes for adhesin production were not identified, genes  
399 involved in adhesin transport were identified in both *Limnohabitans* MAGs and in the  
400 Burkholderiaceae MAG (*bmaC*, *ehaG*, *ata*).

401

## 402 Discussion

403 To date, studies examining the *Daphnia magna* microbiota have only sequenced the  
404 16S rRNA marker gene to understand broad-level interactions and functions of the  
405 microbiota. Here, we were able to assemble the first metagenome-assembled genomes  
406 from the *Daphnia magna* microbiota to elucidate genome-specific functions associated  
407 with highly abundant members of the bacterial community. Our 16S rRNA gene level  
408 data shows that the *Daphnia magna* bacterial community is structured differently than  
409 the surrounding environment and from the microbiome of their food, which has been  
410 also been corroborated by earlier studies [9,30]. We identified five MAGs that were  
411 distinct from each other and distinct from their closest sequenced relatives based on  
412 average nucleotide identity. We found that these MAGs were high- or medium-quality,  
413 meaning they contained some or most of the single-copy genes found in all bacteria.  
414 With metagenomic short-read shotgun sequencing it is unlikely that the MAGs  
415 assembled here contained the full gene sets associated with these species; however,

416 bins of relatively high-quality suggest that we found many important genes within each  
417 assembled genome. Most studies of the *Daphnia magna* microbiota using marker-  
418 based sequencing have identified more OTUs or ASVs and higher diversity than the 12  
419 bins we identified, likely due to the higher sequencing depth necessary for shotgun  
420 sequencing to identify rare taxa [31]. However, the five MAGs assembled from our  
421 shotgun sequencing are mostly consistent with genera found in 16S rRNA sequencing  
422 from other studies and from our own sequencing.

423  
424 The Burkholderiales order has been demonstrated as the most abundant in the  
425 *Daphnia* gut and whole organism microbiota [9,13], and four of the five MAGs  
426 assembled here were identified to families or genera within this order. Two  
427 *Limnohabitans* MAGs were assembled and found at high abundances in adults and  
428 juveniles. Within the Burkholderiales, the genus *Limnohabitans* has been reported to be  
429 highly abundant in the *Daphnia* microbiota, and has been implicated in increasing host  
430 fecundity [12,15]. Here, we show that there are two distinct *Limnohabitans* MAGs that  
431 encode for different metabolic potential. Only one other study has definitively  
432 identified more than one OTU in this genus [13]. We also identify two other MAGs in  
433 the Burkholderiales order, including a *Polaromonas* species and one unclassified

434 Burkholderiaceae. Surprisingly, we also identify a *Pedobacter* MAG, which has  
435 previously only been reported as a rare taxon in the *Daphnia* microbiota [32].  
436  
437 Analysis of annotated genes and pathways across the five MAGs showed overlap and  
438 differences in metabolism. Key pathways such as the TCA cycle were shared across all  
439 MAGs, and multiple ABC transporters of key vitamins and amino acids were identified.  
440 Many genes encoding for the use of different carbohydrates were encoded across the  
441 MAGs. Microalgae are generally rich in carbohydrates [33] and serve as a major food  
442 source for *Daphnia magna* [34], potentially allowing these microbes easy access to  
443 myriad nutrient sources. The two *Limnohabitans* MAGs shared a high proportion of  
444 annotated genes, suggesting some functional similarity between them. Indeed,  
445 multiple metabolic pathways were shared between these two MAGs, including the  
446 glyoxylate cycle, bacteriochlorophyll biosynthesis, and biosynthesis of some vitamins  
447 and amino acids. The *Limnohabitans* MAGs also shared many genomic features with  
448 the *Polaromonas* MAG and the Burkholderiaceae MAG, including multiple TCA cycle  
449 intermediate importers and several transport systems. There is also potential flexibility  
450 among the taxa in encoded respiration, notably in the *Polaromonas* MAG's ability to  
451 use thiosulfate and the Burkholderiaceae's ability to utilize nitrate under hypoxic  
452 conditions. Along with the variety of two-component regulatory systems found within

453 each MAG, the wide range of potential respiratory pathways may allow functions to  
454 sustain through different bacterial species even when stressful environments cause  
455 fluctuations in the abundance of species within the microbiota.

456

457 The difference between taxa identified in the *Daphnia magna* microbiota and its  
458 environment suggest that there are some key interactions between the host and its  
459 associated microbes in order to establish and maintain these microbial populations.

460 Furthermore, there may be some interactions between bacterial species in the  
461 microbiota that could impact the host. We found many genes in the *Limnohabitans*  
462 MAGs and the *Polaromonas* MAG involved in flagellar assembly, type IV pilus  
463 biogenesis and production, and biofilm formation, all of which have been implicated in  
464 host colonization and successful adhesion to host-associated surfaces [35,36,37]. All  
465 MAGs encode for l-rhamnose production, which has been implicated in adhesion to  
466 other cells [23]. Genes in secretion systems implicated in host cell adhesion, particularly  
467 Type I, II, and IV were also encoded [38]. We found many genes involved in host  
468 immune system evasion or modification, which may allow these bacteria to persist  
469 within the host species [39]. Notably, superoxide dismutase and catalase were encoded  
470 by multiple MAGs, suggesting the bacteria could defend against radical oxygen species  
471 produced by the host as a defense mechanism [40]. Also present across MAGs are

472 genes involved in the detoxification of antibiotics and toxins, including multidrug efflux  
473 transporters and pumps (MdlAB/SmdAB, AcrAB-TolC/SmeDEF), macrolide export  
474 (*macA*, *macB*), and stress tolerance to antibiotics (BaeS-BaeR).

475  
476 Biosynthesis and provision of amino acids by bacteria to their host is a well-  
477 documented set of interactions that is known to confer fitness benefits to the host [41-  
478 43]. Here, we find that the *Limnohabitans* MAGs and the Burkholderiaceae MAG  
479 encode for the export of arginine and threonine, essential amino acids for the host  
480 *Daphnia* [25]. Similarly, biosynthesis or metabolism of vitamins and minerals by bacteria  
481 and provisioning to the host has been well-documented in the microbiota of other  
482 organisms [44-46]. Many genes involved in vitamin B biosynthesis were found across all  
483 MAGs. Media supplemented with cobalamin (B<sub>12</sub>) is used to successfully culture  
484 *Daphnia magna* [47], and we find the *Polaromonas* MAG encoded for a complete  
485 cobalamin biosynthesis pathway, suggesting potential vitamin provisioning to the host  
486 from this species. We also find a potential microbe-microbe interaction, where the  
487 *Pedobacter* MAG encodes for cleavage of sialic acids from host tissue, where it can  
488 then be transported and utilized by other species as a carbohydrate source via a sialic  
489 acid TRAP transporter. The breakdown of sialic acid to metabolites that are accessible  
490 to the host by microbiome-associated species has been shown to increase host fitness

491 [48]. If *Limnohabitans* are able to use sialic acid as a nutrient source, this may be the  
492 basis for a microbe-host-microbe interaction, where *Limnohabitans* provides essential  
493 amino acids to the host using energy generated from metabolism of molecules  
494 provisioned from the host.

495  
496 In total, our data shows that there is much versatility in metabolism among the MAGs,  
497 but some overlap in function. As *Daphnia magna* are indiscriminate filter feeders, they  
498 may feed on a wide variety of particulate matter with variable nutrient profiles. The  
499 versatility in metabolism encoded by these MAGs indicates that they are able to utilize  
500 this unpredictable range of nutrients both in the digestive tract and on the carapace.  
501 The specific functions of certain MAGs, particularly in amino acid and vitamin  
502 biosynthesis and export, seem critical in providing nutritional benefits to the host  
503 zooplankton.

504

## 505 **Conclusions**

506 *Daphnia magna* is an important model system for multiple facets of ecology, and has  
507 recently become an organism of interest for understanding fundamental questions  
508 about the microbiota. Our metagenomic sequencing and subsequent analysis  
509 characterizes the *Daphnia magna* microbiota to the species level and finds some

510 genomic features that allow core bacterial species to acquire and biosynthesize  
511 nutrients, and to potentially interact with their host via amino acid and vitamin export.  
512 By examining this relatively simple microbiota via metagenome-assembled genomes,  
513 we can begin to investigate metabolic interactions between the host and its associated  
514 microbes. Future work to further elucidate functions of these MAGs will involve long-  
515 read metagenome sequencing to complete genome assemblies and pure, single-  
516 isolate sequencing to understand strain variation within the microbiota. Furthermore,  
517 transcriptomics and metabolomics could be used to understand which of these  
518 encoded genes are functioning under different environmental and host conditions, and  
519 will direct future hypotheses on host-microbiota interactions. For example, how much of  
520 the differences in *Daphnia* life history and population dynamics across food  
521 environments [49] can be attributed to differences in microbiota composition? These  
522 results will help to inform future work studying the effects of the microbiota on host  
523 health and population dynamics across ecological contexts. Moreover, as more  
524 populations of *Daphnia* and their microbiota are sequenced, it will become possible to  
525 examine the coevolutionary relationships between hosts and microbiota, and this  
526 functional information will be essential for making sense of those relationships.

527

528 **Methods**



529 *Sample collection and extraction.* Two samples of 100 21-day-old adult *Daphnia magna*  
530 and two samples of 6-day-old juvenile *Daphnia* were collected from laboratory cultures  
531 maintained in defined COMBO medium [47]. Laboratory cultures were fed a  
532 standardized volume of green algae *Chlamydomonas reinhardtii* (CPCC 243) to provide  
533 0.25 mg C/ml/day. Samples were immediately ground after collection using in sterile  
534 1.5mL microcentrifuge tubes. To separate bacterial cells from host cells, a modified  
535 protocol from Benson et al. 2014 was used [50]. Samples were suspended in 2mL PBE  
536 buffer and layered on a cushion of 50% sucrose, then centrifuged at 4,000g for 10  
537 minutes. DNA was extracted from the pellets at the base of the sucrose fractions  
538 following the Qiagen DNEasy Blood & Tissue Kit spin-column protocol of total DNA  
539 from animal tissues (Qiagen, Hilden, Germany).

540  
541 *Library preparation and sequencing.* Shotgun sequencing libraries from the two adult  
542 samples and two technical replicates of one juvenile sample were prepared and  
543 multiplexed using the Illumina Nextera XT kit and protocol. Input DNA was quantified  
544 using the Qubit dsDNA system. Libraries were checked using the Agilent Technology  
545 2100 Bioanalyzer. Libraries were manually normalized due to a final library yield under  
546 10nM. Paired-end sequencing was performed on an Illumina MiSeq using a MiSeq  
547 Reagent Kit V2.

548

549 *Quality filtering and metagenome assembly.* Reads were demultiplexed using the built-

550 in Illumina MiSeq Reporter. Quality of demultiplexed reads was checked using FastQC

551 v0.11.5. Reads were trimmed using Trimmomatic v0.36 [51] with the commands:

552 ILLUMINACLIP:NexteraPE-PE.fa:2:30:10 LEADING:3 TRAILING:3

553 SLIDINGWINDOW:4:25 MINLEN:36 to remove adapter sequences and to remove

554 segments of reads where quality fell below 25. Trimmed reads were mapped to the

555 *Daphnia magna* draft genome [52] using BWA [53], Samtools [54], and BEDtools [55],

556 and reads with greater than 80% identity over 50% of the read were filtered. Remaining

557 paired unmapped reads were assembled de novo using metaSPAdes in SPAdes v3.11

558 [56]. A co-assembly of all four samples, a co-assembly of the adult samples, a co-

559 assembly of the juvenile samples, and individual assemblies for each sample were

560 created.

561

562 *Taxonomy-independent sequence binning and identification of individual*

563 *metagenome-assembled genomes.* To resolve genomes of identified organisms and to

564 discover genomes of organisms not present in read-based taxonomy identification

565 programs or entirely new organisms, contigs from the master co-assembly with reads

566 mapped from each sample were binned using CONCOCT within Anvi'o [57], accepting

567 contigs over 2500 bp in length. Contigs greater than 20kb in length were split into  
568 20kb fragments prior to running CONCOCT. Bins from the master co-assembly were  
569 assessed using Anvi'o, using Parks et al.'s quality score (genome completeness - 5x  
570 estimated redundancy or contamination) of  $\geq 50$  as a cutoff for further refinement [58].  
571 Bins meeting this quality cutoff were manually curated within Anvi'o, where contigs  
572 within a bin that deviated dramatically from the mean GC content or mean coverage of  
573 the bin were removed from the bin. Bins that increased completeness when merged,  
574 did not increase redundancy above 10%, and were similar in GC content were merged.  
575 Bins that did not have high (>90% completion) or medium quality (>50% completion)  
576 after merging and refining were not analyzed further. After merging and refining, bins  
577 that still met the quality score cutoff were assigned taxonomy using GTDB-Tk [59,60].  
578 GTDB-Tk uses average nucleotide identity and genome topology to find the closest  
579 genomic relative in its database. The same process was repeated for the juvenile co-  
580 assembly and the adult co-assembly to confirm species presence and attempt to  
581 resolve species identity at different host life stages. Similarity between MAGs was  
582 calculated using the average nucleotide identity tool in Pyani [61].  
583  
584 *Read-based taxonomic classification.* Kaiju v1.5 [62], Kraken v1.0 [63], and MetaPhlAn2  
585 v2.6 [64] were used to assign taxonomy to reads. We used all three identifiers due to

586 due to Kaiju's high rate of false identification [65] and MetaPhlAn2's use of specific  
587 marker genes from reference organisms rather than entire genomes. All programs were  
588 used with their built-in databases. Kraken results were confirmed via cross-comparison  
589 of abundant species with both Kaiju and MetaPhlAn2. All three taxonomy profilers were  
590 also used to assign taxonomy to contigs assembled from each sample. Visualization of  
591 each sample's community composition was performed in R.

592  
593 *Functional profiling.* Contigs from each metagenome-assembled genome and from the  
594 adult, juvenile, and master co-assemblies were annotated using Prokka v1.12 [66].

595 Genes annotated in Prokka were assigned KOs (KEGG Orthologs) using the  
596 GhostKOALA tool on the Kyoto Encyclopedia of Genes and Genomes [67]. KOs  
597 identified from GhostKOALA were mapped to standard KEGG categories and  
598 metabolic pathways using the KEGG Pathway Mapper & KEGG Module tools to  
599 examine pathway completeness and identify pathways of interest [68]. Genes identified  
600 using KEGG and GhostKOALA in each MAG were compared using OrthoVenn [69].  
601 Overlapping and unique orthologs were compared using custom R scripts and with the  
602 'UpSetR' package [70].

603

604 *16S rRNA gene sequencing and identification of contaminant taxa.* The V4  
605 hypervariable region of the 16S rRNA gene was sequenced on the Illumina MiSeq using  
606 a MiSeq Reagent Kit V2 and the same Qiagen DNEasy Blood & Tissue Kit and reagents  
607 as in the shotgun sequencing sample processing. Four samples of five adult *Daphnia*  
608 *magna* were sequenced to compare community composition found in 16S sequencing  
609 to that found in shotgun sequencing, along with four samples of the COMBO media  
610 *Daphnia magna* cultures are raised in, four samples of *Chlamydomonas reinhardtii*, and  
611 two samples of the DNA sequencing kit and library preparation kit as negative controls.  
612 Paired-end reads were analyzed in R using the 'dada2' package to trim primer  
613 sequences, identify amplicon sequence variants, and assign taxonomy [71]. Taxonomy  
614 was assigned using the RefSeq+RDP taxonomic training data set formatted for dada2  
615 [72]. Further analysis of community composition and visualization were carried out using  
616 the 'phyloseq' package in R [73].

617

## 618 **Declarations**

619 *Ethics approval and consent to participate*

620 Not applicable.

621 *Consent for publication*

622 Not applicable.

623 *Availability of data and materials*

624 The datasets supporting the conclusions of this article are available at the NCBI  
625 BioProject Portal under IDs PRJNA543317 (shotgun sequences) and PRJNA543842 (16S  
626 rRNA sequences. Raw metagenomic sequencing reads from each sample are deposited  
627 under accession numbers SAMN11660785 and SAMN11660786. 16S rRNA sequencing  
628 data can be found under accession numbers SAMN11784745 - SAMN11784837. All  
629 scripts for data analysis and visualization are available on GitHub  
630 ([https://github.com/reillyowencooper/daphnia\\_magna\\_metagenome](https://github.com/reillyowencooper/daphnia_magna_metagenome)).

631 *Competing interests*

632 The authors declare that they have no competing interests.

633 *Funding*

634 This work was supported by funds from the University of Nebraska and a Maude  
635 Hammond Fling Faculty Research Fellowship to CEC.

636 *Authors' contributions*

637 ROC and CEC designed the study. ROC collected and analyzed the metagenomic data.  
638 ROC wrote the first draft of the manuscript, and ROC and CEC revised the manuscript  
639 and approved its final form.

640 *Acknowledgements*

641 We are grateful for Dr. Andrew K. Benson, Mallory Van Haute, and Qinnan Yang's  
642 assistance with sequencing preparation and machine use, and to Brady Bathke for  
643 assistance with bioinformatic analyses. This work was completed utilizing the Holland  
644 Computing Center of the University of Nebraska, which receives support from the  
645 Nebraska Research Initiative.

646

## 647 References

- 648 1. Hacquard S, Garrido-Oter R, González A, Spaepen S, Ackermann G, Lebeis S,  
649 McHardy AC, Dangl JL, Knight R, Ley R, Schulze-Lefert P. Microbiota and Host  
650 Nutrition across Plant and Animal Kingdoms. *Cell Host Microbe* 2015;  
651 <https://doi.org/10.1016/j.chom.2015.04.009>
- 652 2. Wahlström A, Sayin SI, Marschall H, Bäckhed F. Intestinal Crosstalk between Bile  
653 Acids and Microbiota and Its Impact on Host Metabolism. *Cell Metab.* 2016;  
654 <https://doi.org/10.1016/j.cmet.2016.05.005>
- 655 3. Sansone CL, Cohen J, Yasunaga A, Xu J, Osborn G, Subramanian H, Gold B,  
656 Buchon N, Cherry S. Microbiota-Dependent Priming of Antiviral Intestinal  
657 Immunity in *Drosophila*. *Cell Host Microbe* 2015;  
658 <https://doi.org/10.1016/j.chom.2015.10.010>

- 659 4. Kaltenpoth M, Göttler W, Herzner G, Strohm E. Symbiotic Bacteria Protect  
660 Wasp Larvae from Fungal Infestation. *Curr Biol.* 2005;15:475-479.
- 661 5. Spor A, Koren O, Ley R. Unravelling the effects of the environment and host  
662 genotype on the gut microbiome. *Nat. Rev. Microbiol.* 2011;9:279-290.
- 663 6. Ebert, D. A Genome for the Environment. *Science* 2011;331:539-540.
- 664 7. Qi W, Nong G, Preston JF, Ben-Ami F, Ebert D. Comparative metagenomics of  
665 *Daphnia* symbionts. *BMC Genom.* 2009;10:21.
- 666 8. Eckert EM, Pernthaler J. Bacterial epibionts of *Daphnia*: a potential route for the  
667 transfer of dissolved organic carbon in freshwater food webs. *ISME J.*  
668 2014;8(9):1808-1819.
- 669 9. Freese HM, Schink B. Composition and Stability of the Microbial Community  
670 inside the Digestive Tract of the Aquatic Crustacean *Daphnia magna*. *Microb*  
671 *Ecol.* 2011;62:882-894.
- 672 10. Sison-Mangus MP, Mushegian AA, Ebert D. Water fleas require microbiota for  
673 survival, growth and reproduction. *ISME J.* 2015;9:59-67.
- 674 11. Macke E, Callens M, Meester LD, Decaestecker E. Host-genotype dependent  
675 gut microbiota drives zooplankton tolerance to toxic cyanobacteria. *Nat*  
676 *Commun.* 2017;8:13.



- 677 12. Peerakietkhajorn S, Tsukado K, Kato Y, Matsuura T, Watanabe H. Symbiotic  
678 bacteria contribute to increasing the population size of a freshwater crustacean,  
679 *Daphnia magna*. Environ. Microbiol. Rep. 2015;7(2):364-372.
- 680 13. Motiei A, Brindefalk B, Ogonowski M, El-Shehawy R, Pastuszek P, Ek K,  
681 Liewenborg B, Udekwu K, Gorokhova E. Disparate effects of antibiotic-induced  
682 microbiome change and enhanced fitness in *Daphnia magna*. Preprint.  
683 <https://doi.org/10.1101/586669>
- 684 14. Callens M, Hajime W, Yasuhiko K, Miura J, Decaestecker E. Microbiota inoculum  
685 composition affects holobiont assembly and host growth in *Daphnia*.  
686 Microbiome 2018;6:56.
- 687 15. Peerakietkhajorn S, Kato Y, Kasalicky V, Matsuura T, Watanabe J.  
688 Betaproteobacteria *Limnohabitans* strains increase fecundity in the crustacean  
689 *Daphnia magna*: symbiotic relationship between major bacterioplankton and  
690 zooplankton in freshwater ecosystem. Environ Microbiol. 2016;18(8):2366-2374.
- 691 16. Richter M, Rosselló-Móra R. Shifting the genomic gold standard for the  
692 prokaryotic species definition. Proc Natl Acad Sci U.S.A 2009;106(45):19126-  
693 19131.
- 694 17. Légeret B, Schulz-Raffelt M, Nguyen HM, Auroy P, Beisson F, Peltier G, Blanc G,  
695 Li-Beisson Y. Lipidomic and transcriptomic analyses of *Chlamydomonas*

- 696 *reinhardtii* under heat stress unveil a direct route for the conversion of  
697 membrane lipids into storage lipids. *Plant Cell Environ.* 2016;39:834-847.
- 698 18. Hernandez-Agreda A, Gates RD, Ainsworth TD. Defining the Core Microbiome  
699 in Corals' Microbial Soup. *Trends Microbiol.* 2017;25(2):125-140.
- 700 19. Hinz A, Lee S, Jacoby K, Manoil C. Membrane Proteases and Aminoglycoside  
701 Antibiotic Resistance. *J Bacteriol.* 2011;193(18):4790-4797.
- 702 20. Kasilicky V, Zeng Y, Piwosz K, Šimek K, Kratochvilová H, Koblížek. Aerobic  
703 Anoxygenic Photosynthesis Is Commonly Present within the Genus  
704 *Limnohabitans*. *Environ Microbiol.* 2018;84(1):13.
- 705 21. Mariadassou M, Pichon S, Ebert D. Microbial ecosystems are dominated by  
706 specialist taxa. *Ecol Lett.* 2015;18:974-982.
- 707 22. Sperisen P, Schmid CD, Bucher P, Zilian O. Stealth Proteins: In Silico  
708 Identification of a Novel Protein Family Rendering Bacterial Pathogens Invisible  
709 to Host Immune Defense. *PLOS Comput Biol.* 2005;1(6):0492-0499.
- 710 23. Mistou MY, Sutcliffe IC, van Sorge NM. Bacterial glycobiology: rhamnose-  
711 containing cell wall polysaccharides in Gram-positive bacteria. *FEMS Microbiol*  
712 *Rev.* 2016;40:464-479.
- 713 24. Fanning S, Hall LJ, Cronin M, Zomer A, MacSharry J, Goulding D, Motherway  
714 MO, Shanahan F, Nally K, Dougan G, van Sinderen D. Bifidobacterial surface-

- 715 exopolysaccharide facilitates commensal-host interaction through immune  
716 modulation and pathogen protection. Proc Natl Acad Sci U.S.A  
717 2012;109(6):2108-2113.
- 718 25. Fink P, Pflitsch C, Marin K. Dietary Essential Amino Acids Affect the  
719 Reproduction of the Keystone Herbivore *Daphnia pulex*. PLoS ONE  
720 2011;6(12):8.
- 721 26. Helliwell KE, Wheeler GL, Leptos KC, Goldstein RE, Smith AG. Insights into the  
722 Evolution of Vitamin B12 Auxotrophy from Sequenced Algal Genomes. Mol Biol  
723 Evol. 2011;28(10):2921-2933.
- 724 27. Elendt BP, Bias WR. Trace nutrient deficiency in *Daphnia magna* cultured in  
725 standard medium for toxicity testing. Effects of the optimization of culture  
726 conditions on life history parameters of *D. magna*. Water Res. 1990;24(9):1157-  
727 1167.
- 728 28. Tong Y, Guo M. Bacterial heme-transport proteins and their heme-coordination  
729 modes. Arch Biochem Biophys. 2009;481(1):1-15.
- 730 29. Severi E, Hood DW, Thomas GH. Sialic acid utilization by bacterial pathogens.  
731 Microbiology 2007;153:2817-2822.

- 732 30. Callens M, Macke E, Muylaert K, Bossier P, Lievens B, Waud M, Decaestecker E.  
733 Food availability affects the strength of mutualistic host-microbiota interactions  
734 in *Daphnia magna*. ISME J. 2016;10:911-920.
- 735 31. Ranjan R, Rani A, Metwally A, McGee HS, Perkins DL. Analysis of the  
736 microbiome: Advantages of whole genome shotgun versus 16S amplicon  
737 sequencing. Biochem Biophys. Res Commun. 2016;469(4):967-977.
- 738 32. Poehlein A, Daniel R, Simeonova DD. Genome sequence of *Pedobacter*  
739 *glucosidilyticus* DD6b, isolated from zooplankton *Daphnia magna*. Stand  
740 Genomic Sci. 2015;10:100.
- 741 33. Work VH, Radakovits R, Jinkerson RE, Meuser JE, Elliott LG, Vinyard DJ, Laurens  
742 LML, Dismukes GC, Posewitz MC. Increased Lipid Accumulation in the  
743 *Chlamydomonas reinhardtii* *sta7-10* Starchless Isoamylase Mutant and Increase  
744 Carbohydrate Synthesis in Complemented Strains. Eukaryot Cell 2010;9(8):1251-  
745 1261.
- 746 34. Taipale SJ, Galloway AWE, Aalto SL, Kahilainen KK, Strandberg U, Kankaala P.  
747 Terrestrial carbohydrates support freshwater zooplankton during phytoplankton  
748 deficiency. Sci Rep 2016;6:e30897.
- 749 35. Latasa C, Roux A, Toledo-Arana A, Ghigo JM, Gamazo C, Penadés JR, Lasa I.  
750 BapA, a large secreted protein required for biofilm formation and host

- 751           colonization of *Salmonella enterica* serovar Enteritidis. *Mo Microbiol.*  
752           2005;58(5):1322-1339.
- 753       36. Rossez Y, Wolfson EB, Holmes A, Gally DL, Holden NJ. Bacterial Flagella: Twist  
754           and Stick, or Dodge across the Kingdoms. *PLoS Pathog.* 2015;11(1):e1004483.
- 755       37. McLoughlin K, Schluter J, Rakoff-Nahoum S, Smith AL, Foster KR. Host Selection  
756           of Microbiota via Differential Adhesion. *Cell Host Microbe* 2016;19:550-559.
- 757       38. Kline KA, Fälker S, Dahlberg S, Normark S, Henriques-Normark B. Bacterial  
758           Adhesins in Host-Microbe Interactions. *Cell Host Microbe* 2009;5:580-592.
- 759       39. Foster TJ. Immune evasion by Staphylococci. *Nat Rev Microbiol.* 2005;3:948-  
760           958.
- 761       40. Reveillaud J, Anderson R, Reves-Sohn S, Cavanaugh C, Huber JA. Metagenomic  
762           investigation of vestimentiferan tubeworm endosymbionts from Mid-Cayman  
763           Rise reveals new insights into metabolism and diversity. *Microbiome* 2018;6:19.
- 764       41. Hansen AK, Moran NA. Aphid genome expression reveals host-symbiont  
765           cooperation in the production of amino acids. *Proc Natl Acad Sci U.S.A*  
766           2011;108(7):2849-2854.
- 767       42. Pérez-Brocal V, Gil R, Ramos S, Lamelas A, Postigo M, Michelena JM, Silva FJ,  
768           Moya A, Latorre A. A Small Microbial Genome: The End of a Long Symbiotic  
769           Relationship? *Science* 2006;314:312-313.

- 770 43. Douglas AE. The microbial dimension in insect nutritional ecology. *Funct Ecol.*  
771 2011;23:38-47.
- 772 44. Degnan PH, Taga ME, Goodman AL. Vitamin B12 as a Modulator of Gut  
773 Microbial Ecology. *Cell Metab.* 2014;20:769-778.
- 774 45. Smith TA, Driscoll T, Gillespie JJ, Raghavan R. A *Coxiella*-Like Endosymbiont Is a  
775 Potential Vitamin Source for the Lone Star Tick. *Genome Biol Evol.*  
776 2015;7(3):831-838.
- 777 46. McKenney EA, Koelle K, Dunn RR, Yoder AD. The ecosystem services of animal  
778 microbiomes. *Mol Ecol.* 2018;27:2164-2172.
- 779 47. Kilham SS, Kreeger DA, Lynn SG, Goulden CE, Herrera L. COMBO: a defined  
780 freshwater culture medium for algae and zooplankton. *Hydrobiologia*  
781 1998;377:147-159.
- 782 48. Castanys-Muñoz E, Martin MJ, Vazquez E. Building a Beneficial Microbiome  
783 from Birth. *Adv Nutr* 2016;7:323-330.
- 784 49. Nelson WA, McCauley E, Wrona FJ. Multiple dynamics in a single predator-prey  
785 system: experimental effects of food quality. *Proc R Soc Lond B.* 2001;268:1223-  
786 1230.
- 787 50. Benson AK, David JRD, Gilbreth SE, Smith G, Nietfeldt J, Legge R, Kim J, Sinha  
788 R, Duncan CE, Ma J, Singh I. Microbial successions are associated with changes

- 789 in chemical profiles of a model refrigerated fresh pork sausage during an 80-day  
790 shelf-life study. *Appl Environ Microbiol.* 2014;80(17):5178-5194.
- 791 51. Bolger AM, Lohse M, Usadel B. Trimmomatic: a flexible trimmer for Illumina  
792 sequence data. *Bioinformatics* 2014;30(15):2114-2120.
- 793 52. Daphnia Genomics. Genome Informatics Lab, Indiana University Biology  
794 Department. <http://wfleabase.org>. Accessed 02 March 2018.
- 795 53. Li H. Aligning sequence reads, clone sequences and assembly contigs with  
796 BWA-MEM. Preprint. <https://arxiv.org/abs/1303.3997>
- 797 54. Li H, Handsaker B, Wysoker A, Fennell T, Ruan J, Homer N, Marth G, Abecasis  
798 G, Durbin R, 1000 Genome Project Data Processing Subgroup. The Sequence  
799 Alignment/Map format and SAMtools. *Bioinformatics* 2009;25(16):2078-2079.
- 800 55. Quinlan AR, Hall IM. BEDTools: a flexible suite of utilities for comparing  
801 genomic features. *Bioinformatics* 2010;26(6):841-842.
- 802 56. Nurk S, Meleshko D, Korobeynikov A, Pevzner PA. metaSPAdes: a new versatile  
803 metagenomic assembler. *Genome Res.* 2017;27:824-834.
- 804 57. Eren AM, Esen ÖC, Quince C, Vineis JH, Morrison HG, Sogin ML, Delmont TO.  
805 Anvi'o: an advanced analysis and visualization platform for 'omics data. *PeerJ*  
806 2015;3:e1319.

- 807 58. Parks DH, Rinke C, Chuvochina M, Chaumeil PA, Woodcroft BJ, Evans PN,  
808 Hugenholtz P, Tyson GW. Recovery of nearly 8,000 metagenome-assembled  
809 genomes substantially expands the tree of life. *Nat Microbiol.* 2017;2:1533-  
810 1542.
- 811 59. Parks DH, Chuvochina M, Waite DW, Rinke C, Skarshewski, Chaumeil PA,  
812 Hugenholtz P. A standardized bacterial taxonomy based on genome phylogeny  
813 substantially revises the tree of life. *Nat Biotechnol.* 2018;36(10):996-1004.
- 814 60. Chaumeil PA, Hugenholtz P, Parks DH. GTDB-Tk: A toolkit to classify genomes  
815 with the Genome Taxonomy Database.  
816 <https://github.com/Ecogenomics/GTDBTk>
- 817 61. Pritchard L, Glover RH, Humphris S, Elphinstone GJ, Toth IK. Genomics and  
818 taxonomy in diagnostics for food security: soft-rotting enterobacterial plant  
819 pathogens. *Anal Methods* 2016;8:12-24.
- 820 62. Menzel P, Ng KL, Krogh A. Fast and sensitive taxonomic classification for  
821 metagenomics with Kaiju. *Nat Commun.* 2016;7:11257.
- 822 63. Wood DE, Salzberg SL. Kraken: ultrafast metagenomic sequence classification  
823 using exact alignments. *Genome Biol.* 2014;15:R46.



- 824 64. Segata N, Waldron L, Ballarini A, Narsimhan V, Jousson O, Huttenhower C.  
825 Metagenomic microbial community profiling using unique clade-specific marker  
826 genes. *Nat Methods* 2012;9(8):811-814.
- 827 65. Piro VC, Matschkowski M, Renard BY. MetaMeta: integrating metagenome  
828 analysis tools to improve taxonomic profiling. *Microbiome* 2017;5:101.
- 829 66. Seemann T. Prokka: rapid prokaryotic genome annotation. *Bioinformatics*  
830 2014;30(14):2068-2069.
- 831 67. Kanehisa M, Sato Y, Morishima K. BlastKOALA and GhostKOALA for Functional  
832 Characterization of Genome and Metagenome Sequences. *J Mol Biol.*  
833 2016;428:726-731.
- 834 68. Kanehisa M, Sato Y, Kawashima M, Furumichi M, Tanabe M. KEGG as a  
835 reference resource for gene and protein annotation. *Nucleic Acids Res.*  
836 2016;44:D457-D462.
- 837 69. Wang Y, Coleman-Derr D, Chen G, Gu YQ. OrthoVenn: a web server for  
838 genome wide comparison and annotation of orthologous clusters across  
839 multiple species. *Nucleic Acids Res.* 2015;43:W78-W84.
- 840 70. Conway JR, Lex A, Gehlenborg N. UpSetR: an R package for the visualization of  
841 intersecting sets and their properties. *Bioinformatics* 2017;33(18):2938-2940.

- 842 71. Callahan BJ, McMurdie PJ, Rosen MJ, Han AW, Johnson AJA, Holmes SP.  
843 DADA2: High-resolution sample inference from Illumina amplicon data. Nat  
844 Methods 2016;13(7):581-583.
- 845 72. Alishum A. DADA2 formatted 16S rRNA gene sequences for both bacteria &  
846 archaea. Version 1 Refseq+RDP. 2019; <http://doi.org/10.5281/zenodo.2541239>
- 847 73. McMurdie PJ, Holmes S. phyloseq: An R Package for Reproducible Interactive  
848 Analysis and Graphics of Microbiome Census Data. PLoS ONE  
849 2013;8(4):e61217.
- 850
- 851 Table 3.

| <b>KEG<br/>G ID</b> | <b>Module</b>                   | <b>Pathway Name</b>                                                    | <b>MAG</b> |
|---------------------|---------------------------------|------------------------------------------------------------------------|------------|
| M00307              | Central carbohydrate metabolism | Pyruvate oxidation, pyruvate => acetyl-CoA                             | All        |
| M00009              | Central carbohydrate metabolism | Citrate cycle (TCA cycle, Krebs cycle)                                 | All        |
| M00010              | Central carbohydrate metabolism | First carbon oxidation, oxaloacetate => 2-oxoglutarate                 | All        |
| M00011              | Central carbohydrate metabolism | Citrate cycle, second carbon oxidation, 2-oxoglutarate => oxaloacetate | All        |

|            |                                                |                                                                           |                     |
|------------|------------------------------------------------|---------------------------------------------------------------------------|---------------------|
| M00<br>005 | Central carbohydrate metabolism                | PRPP biosynthesis, ribose 5P => PRPP                                      | All                 |
| M00<br>120 | Cofactor and vitamin metabolism                | Coenzyme A biosynthesis, pantothenate => CoA                              | All                 |
| M00<br>793 | Polyketide sugar unit biosynthesis             | dTDP-L-rhamnose biosynthesis                                              | All                 |
| M00<br>250 | ABC-2 type and other transport systems         | Lipopolysaccharide transport system                                       | All                 |
| M00<br>255 | ABC-2 type and other transport systems         | Lipoprotein-releasing system                                              | All                 |
| M00<br>336 | Bacterial secretion system                     | Twin-arginine translocation (Tat) system                                  | All                 |
| M00<br>434 | Two-component regulatory system                | PhoR-PhoB (phosphate starvation response) two-component regulatory system | All                 |
| M00<br>045 | Histidine metabolism                           | Histidine degradation, histidine => N-formiminoglutamate => glutamate     | Limnohabitans sp. 1 |
| M00<br>435 | Mineral and organic ion transport system       | Taurine transport system                                                  | Limnohabitans sp. 1 |
| M00<br>193 | Mineral and organic ion transport system       | Putative spermidine/putrescine transport system                           | Limnohabitans sp. 1 |
| M00<br>605 | Saccharide, polyol, and lipid transport system | Glucose/mannose transport system                                          | Limnohabitans sp. 1 |

|            |                                                |                                                                      |                     |
|------------|------------------------------------------------|----------------------------------------------------------------------|---------------------|
| M00<br>607 | Saccharide, polyol, and lipid transport system | Glycerol transport system                                            | Limnohabitans sp. 1 |
| M00<br>008 | Central carbohydrate metabolism                | Entner-Doudoroff pathway, glucose-6P => glyceraldehyde-3P + pyruvate | Limnohabitans sp. 2 |
| M00<br>192 | Mineral and organic ion transport system       | Putative thiamine transport system                                   | Limnohabitans sp. 2 |
| M00<br>259 | ABC-2 type and other transport systems         | Heme transport system                                                | Limnohabitans sp. 2 |
| M00<br>001 | Central carbohydrate metabolism                | Glycolysis (Embden-Meyerhof pathway), glucose => pyruvate            | Pedobacter sp.      |
| M00<br>854 | Other carbohydrate metabolism                  | Glycogen biosynthesis, glucose-1P => glycogen/starch                 | Pedobacter sp.      |
| M00<br>026 | Histidine metabolism                           | Histidine biosynthesis, PRPP => histidine                            | Pedobacter sp.      |
| M00<br>096 | Terpenoid backbone biosynthesis                | C5 isoprenoid biosynthesis, non-mevalonate pathway                   | Pedobacter sp.      |
| M00<br>364 | Terpenoid backbone biosynthesis                | C10-C20 isoprenoid biosynthesis, bacteria                            | Pedobacter sp.      |
| M00<br>256 | ABC-2 type and other transport systems         | Cell division transport system                                       | Pedobacter sp.      |
| M00<br>707 | Drug efflux transporter/pump                   | Multidrug resistance, MdlAB/SmdAB transporter                        | Pedobacter sp.      |

|            |                                                   |                                                                     |                    |
|------------|---------------------------------------------------|---------------------------------------------------------------------|--------------------|
| M00<br>595 | Sulfur metabolism                                 | Thiosulfate oxidation by SOX complex,<br>thiosulfate => sulfate     | Polaromonas<br>sp. |
| M00<br>087 | Fatty acid biosynthesis<br>and degradation        | beta-Oxidation                                                      | Polaromonas<br>sp. |
| M00<br>020 | Serine and threonine<br>metabolism                | Serine biosynthesis, glycerate-3P => serine                         | Polaromonas<br>sp. |
| M00<br>125 | Cofactor and vitamin<br>metabolism                | Riboflavin biosynthesis, GTP =><br>riboflavin/FMN/FAD               | Polaromonas<br>sp. |
| M00<br>122 | Cofactor and vitamin<br>metabolism                | Cobalamin biosynthesis, cobinamide =><br>cobalamin                  | Polaromonas<br>sp. |
| M00<br>436 | Mineral and organic ion<br>transport system       | Sulfonate transport system                                          | Polaromonas<br>sp. |
| M00<br>669 | Saccharide, polyol, and<br>lipid transport system | gamma-Hexachlorocyclohexane transport<br>system                     | Polaromonas<br>sp. |
| M00<br>320 | ABC-2 type and other<br>transport systems         | Lipopolysaccharide export system                                    | Polaromonas<br>sp. |
| M00<br>647 | Drug efflux<br>transporter/pump                   | Multidrug resistance, efflux pump AcrAB-<br>TolC/SmeDEF             | Polaromonas<br>sp. |
| M00<br>339 | Bacterial secretion<br>system                     | RaxAB-RaxC type I secretion system                                  | Polaromonas<br>sp. |
| M00<br>454 | Two-component<br>regulatory system                | KdpD-KdpE (potassium transport) two-<br>component regulatory system | Polaromonas<br>sp. |

|            |                                                |                                                                           |                           |
|------------|------------------------------------------------|---------------------------------------------------------------------------|---------------------------|
| M00<br>493 | Two-component regulatory system                | AlgZ-AlgR (alginate production) two-component regulatory system           | Polaromonas sp.           |
| M00<br>501 | Two-component regulatory system                | PilS-PilR (type 4 fimbriae synthesis) two-component regulatory system     | Polaromonas sp.           |
| M00<br>632 | Other carbohydrate metabolism                  | Galactose degradation, Leloir pathway, galactose => alpha-D-glucose-1P    | Unknown Burkholderiac eae |
| M00<br>549 | Other carbohydrate metabolism                  | Nucleotide sugar biosynthesis, glucose => UDP-glucose                     | Unknown Burkholderiac eae |
| M00<br>554 | Other carbohydrate metabolism                  | Nucleotide sugar biosynthesis, galactose => UDP-galactose                 | Unknown Burkholderiac eae |
| M00<br>579 | Carbon fixation                                | Phosphate acetyltransferase-acetate kinase pathway, acetyl-CoA => acetate | Unknown Burkholderiac eae |
| M00<br>183 | RNA polymerase                                 | RNA polymerase, bacteria                                                  | Unknown Burkholderiac eae |
| M00<br>300 | Mineral and organic ion transport system       | Putrescine transport system                                               | Unknown Burkholderiac eae |
| M00<br>209 | Mineral and organic ion transport system       | Osmoprotectant transport system                                           | Unknown Burkholderiac eae |
| M00<br>214 | Saccharide, polyol, and lipid transport system | Methyl-galactoside transport system                                       | Unknown Burkholderiac eae |
| M00<br>204 | Saccharide, polyol, and lipid transport system | Trehalose/maltose transport system                                        | Unknown Burkholderiac eae |

|            |                                    |                                                                         |                                 |
|------------|------------------------------------|-------------------------------------------------------------------------|---------------------------------|
| M00<br>325 | Bacterial secretion<br>system      | alpha-Hemolysin/cyclolysin transport<br>system                          | Unknown<br>Burkholderiac<br>eae |
| M00<br>333 | Bacterial secretion<br>system      | Type IV secretion system                                                | Unknown<br>Burkholderiac<br>eae |
| M00<br>449 | Two-component<br>regulatory system | CreC-CreB (phosphate regulation) two-<br>component regulatory system    | Unknown<br>Burkholderiac<br>eae |
| M00<br>450 | Two-component<br>regulatory system | BaeS-BaeR (envelope stress response)<br>two-component regulatory system | Unknown<br>Burkholderiac<br>eae |
| M00<br>471 | Two-component<br>regulatory system | NarX-NarL (nitrate respiration) two-<br>component regulatory system     | Unknown<br>Burkholderiac<br>eae |

---

852
